# Supplementary material
Source: PubMed Central journal article supplement (PMC5591640)
Supplement: NIHMS901737-supplement-supplement_1.pdf [file NIHMS901737-supplement-supplement_1.pdf]

ONLINE REPOSITORY

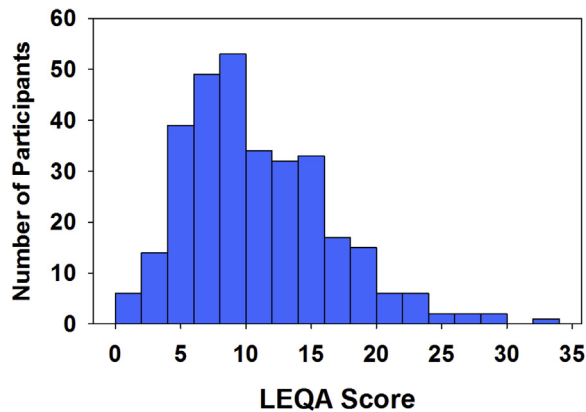

FIGURE E1. Distribution of life events scores. *LEQA*, Life Events Questionnaire for Adolescents.

TABLE E1. Relation of covariates to a high LEQA score at age 16 (n = 318)

|                                        | High LEQA score |      | P*    |
|----------------------------------------|-----------------|------|-------|
|                                        | n               | %    |       |
| Participant characteristics            |                 |      |       |
| Sex                                    |                 |      |       |
| Male                                   | 159             | 50.9 |       |
| Female                                 | 159             | 65.4 | .009  |
| Race/Ethnicity†                        |                 |      |       |
| Non-Hispanic white                     | 189             | 55.0 |       |
| All others                             | 129             | 62.8 | .168  |
| Skin prick test 16 y‡                  |                 |      |       |
| Negative                               | 86              | 59.3 |       |
| ≥1 positive                            | 224             | 58.9 | .952  |
| Wheeze 16 y                            |                 |      |       |
| No                                     | 231             | 54.1 |       |
| Active past year                       | 77              | 67.5 | .039  |
| MD asthma 16 y                         |                 |      |       |
| No                                     | 254             | 55.9 |       |
| Active past year                       | 57              | 66.7 | .137  |
| Overweight 16 y§                       |                 |      |       |
| <25 BMI                                | 233             | 57.9 |       |
| ≥25 BMI                                | 84              | 59.5 | .801  |
| Smoking 16 y                           |                 |      |       |
| No                                     | 265             | 54.7 |       |
| Active                                 | 36              | 86.1 | <.001 |
| Parental characteristics at enrollment |                 |      |       |
| Smoking                                |                 |      |       |
| No                                     | 207             | 59.4 |       |
| Active                                 | 107             | 57.9 | .801  |
| Education                              |                 |      |       |
| >12 y                                  | 205             | 55.6 |       |
| ≤12 y                                  | 108             | 63.9 | .158  |
| Age                                    |                 |      |       |
| ≤28 y                                  | 207             | 60.9 |       |
| >28 y                                  | 111             | 53.2 | .184  |
| MD asthma                              |                 |      |       |
| No                                     | 233             | 58.8 |       |
| Yes, ever                              | 61              | 59.0 | .975  |

BMI, Body mass index; *LEQA*, Life Events Questionnaire for Adolescents; MD, medical doctor.

\*P values (2-sided) based on Pearson  $\chi^2$  statistic.

†Participant race/ethnicity determined from parental information provided at enrollment.

‡At least one positive skin prick test at age 16 years based on 3-mm mean cutoff.

§Nurse-measured height and weight.

**TABLE E2.** Relation of covariates to active physician-diagnosed asthma at age 16, limited to those with LEQA data (n = 311)

|                                        | Active asthma 16 y |      | P*    |
|----------------------------------------|--------------------|------|-------|
|                                        | N                  | %    |       |
| Participant characteristics            |                    |      |       |
| Sex                                    |                    |      |       |
| Male                                   | 157                | 18.5 |       |
| Female                                 | 154                | 18.2 | .947  |
| Race/ethnicity†                        |                    |      |       |
| Non-Hispanic white                     | 184                | 15.2 |       |
| All others                             | 127                | 22.8 | .088  |
| Skin prick test 16 y‡                  |                    |      |       |
| Negative                               | 85                 | 7.1  |       |
| ≥1 positive                            | 219                | 21.9 | .002  |
| Wheeze 16 y                            |                    |      |       |
| No                                     | 231                | 0.43 |       |
| Active past year                       | 77                 | 73.7 | <.001 |
| Overweight 16 y§                       |                    |      |       |
| <25 BMI                                | 229                | 15.3 |       |
| ≥25 BMI                                | 81                 | 27.2 | .018  |
| Smoking 16 y                           |                    |      |       |
| No                                     | 261                | 19.5 |       |
| Active                                 | 33                 | 12.1 | .303  |
| Parental characteristics at enrollment |                    |      |       |
| Parental                               |                    |      |       |
| Smoking                                |                    |      |       |
| No                                     | 204                | 19.1 |       |
| Active                                 | 103                | 16.5 | .576  |
| Education                              |                    |      |       |
| >12 y                                  | 203                | 19.7 |       |
| ≤12 y                                  | 103                | 15.5 | .373  |
| Age                                    |                    |      |       |
| ≤28 y                                  | 202                | 20.8 |       |
| >28 y                                  | 109                | 13.8 | .126  |
| MD asthma                              |                    |      |       |
| No                                     | 229                | 16.2 |       |
| Yes, ever                              | 59                 | 25.4 | .099  |

BMI, Body mass index; LEQA, Life Events Questionnaire for Adolescents; MD, medical doctor.

\*P values (2-sided) based on the Pearson  $\chi^2$  statistic.

†Participant race/ethnicity determined from parental information provided at enrollment.

‡At least one positive skin prick test at age 16 years based on 3-mm mean cutoff.

§Nurse-measured height and weight.
